# Supplementary material for: A Fresh Look on Old Clothes: Laundry Smell Boosts Second-Hand Store Sales
Source: MDPI journal article supplement (doi:10.3390/brainsci12111526), 2022-11-10

Please rate your current feeling

Very negative

Very positive

1 2 3 4 5 6 7 8 9 10

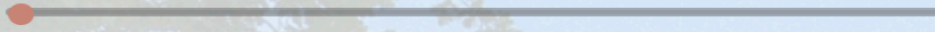

Please rate your current energy level

Very low

Very high

1 2 3 4 5 6 7 8 9 10

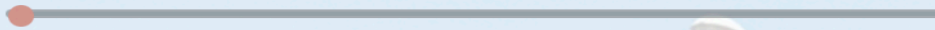

Please rate your general impression of the store

Very negative

Very positive

1 2 3 4 5 6 7 8 9 10

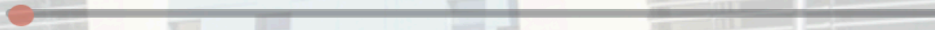

Please rate the quality of the products

Very low

Very high

1 2 3 4 5 6 7 8 9 10

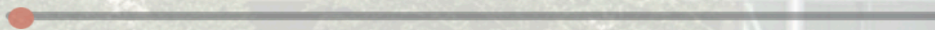

Please rate the cleanliness of the store in general

Not at all clean

Very clean

1 2 3 4 5 6 7 8 9 10

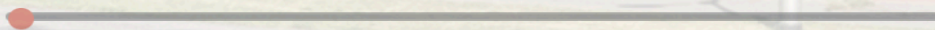

Please rate the cleanliness of the products

Not at all clean

Very clean

1 2 3 4 5 6 7 8 9 10

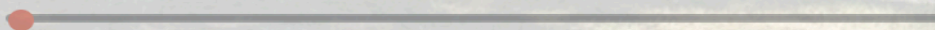

**How much money did you spend in the store today?**

☐ I spent (in numbers, for instance: 25,10)

☐ I prefer not to answer

**What kind of products did you buy?**

- ☐ Shirts
- ☐ Shoes
- ☐ Underwear
- ☐ Jackets
- ☐ Pants
- ☐ Accessories
- ☐ Blouses
- ☐ Other

**How many products did you buy?**

**How likely is it that you will visit this store again?**

Very unlikely

1

2

3

4

5

6

7

8

Very likely

9

10

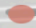

**I identify as**

- ☐ Female
- ☐ Male
- ☐ Other
- ☐ I prefer not to answer

**My age is**

☐ Insert your age below (in numbers)

☐ I prefer not to answer

**Did you notice anything unusual in this shop? You can select multiple answers.**

- ☐ I noticed a particular color or light
- ☐ I noticed a particular sound
- ☐ I noticed a particular smell
- ☐ I noticed a particular message
- ☐ I noticed nothing unusual in the shop

Please rate your overall smelling ability

Very bad 1 2 3 4 5 6 7 8 9 10 Very good

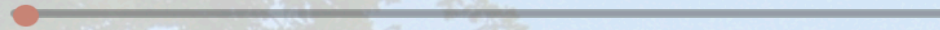

How would you describe the smell in the store?

☐ Insert your description below

☐ The store had no particular smell

Please rate the smell in the store on the following aspects:

Very low 1 2 3 4 5 6 7 8 9 10 Very high

Pleasantness (how nice the smell is)

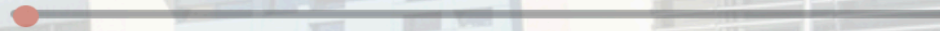

Cleanliness (how clean the smell is)

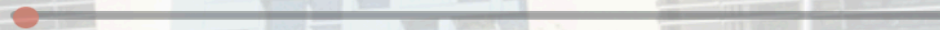

Appropriateness (how the smell fits in the environment)

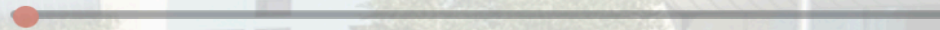

Intensity (how strong the smell is)

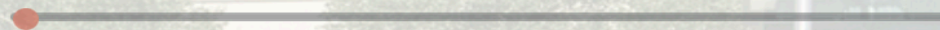

Familiarity (how known the smell is)

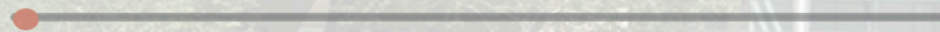

Supplement: s1 [file s1]
